# Supplementary material for: West Nile Virus ( Orthoflavivirus nilense ) RNA concentrations in wastewater solids at five wastewater treatment plants in the United States
Source: PeerJ journal article supplement (doi:10.7717/peerj.19748), 2025-07-23
Supplement: MIQE_WNV.xlsx [file MIQE_WNV.xlsx]

## Sheet: dMIQE2020
ITEM TO CHECK	PROVIDED	COMMENT
Column1	Y/N	Column2	Y	Y	raw data uploaded to online repository with ID:
1. SPECIMEN			N	N	raw data included as supplemental files:
Detailed description of specimen type and numbers	Y	Methods of Main Text, lines 142-159 page 5		NA	raw data available on request:
Sampling procedure (including time to storage)	Y	Methods of Main Text, lines 161-163, page 5			raw data not available:
Sample aliquotation, storage conditions and duration	Y	Methods of Main Text, lines 165-169, page 5
2. NUCLEIC ACID EXTRACTION
Description of extraction method including amount of sample processed	Y	Methods of Main Text and References in Methods, lines 171-173, and in Data Descriptor reference Boehm et al. 2024
Volume of solvent used to elute/resuspend extract	Y	Methods of Main Text and References in Methods. lines 171-173, and in Data Descriptor reference Boehm et al. 2024
Number of extraction replicates	Y	Methods of Main Text, lines 175-177, page 5
Extraction blanks included?	Y	Methods of Main Text, line 199-200, page 6
3. NUCLEIC ACID ASSESSMENT AND STORAGE
Method to evaluate quality of nucleic acids	N	NA
Method to evaluate quantity of nucleic acids (including molecular weight and calculations when using mass)	N	NA
Storage conditions: temperature, concentration, duration, buffer, aliquots	Y	Methods of Main Text, line 177-180 page 5
Clear description of dilution steps used to prepare working DNA solution	Y	Methods of Main Text, line 209-210, page 6
4. NUCLEIC ACID MODIFICATION
Template modification (digestion, sonication, pre-amplification, bisulphite etc.)	N	NA
Details of repurification following modification if performed	N	NA
5. REVERSE TRANSCRIPTION
cDNA priming method and concentration	N	NA
One or two step protocol (include reaction details for two step)	Y	Methods of Main Text, line 205, page 6
Amount of RNA added per reaction	N	None done
Detailed reaction components and conditions	Y	Methods of Main Text, lines 204-211, page 6
Estimated copies measured with and without addition of RT*	N	Not Done
Manufacturer of reagents used with catalogue and lot numbers	N	In methids and in References in Methods for data Descriptor (Boehm et al. 2024), also line 206, page 6
Storage of cDNA: temperature, concentration, duration, buffer and aliquots	N	NA
6. dPCR OLIGONUCLEOTIDES DESIGN AND TARGET INFORMATION
Sequence accession number or official gene symbol	Y	Methods of Main Text, see reference for original assay, line 123, page 4
Method (software) used for design and in silico verification	Y	We did not design the assay, methods for in silico verification on lines 131-135, page 4
Location of amplicon	Y	Methods of Main Text, see reference for original assay, line 123, page 4
Amplicon length	N	In reference for assay, we did not design the assay
Primer and probe sequences (or amplicon context sequence)**	Y	Table 1
Location and identity of any modifications	N	NA
Manufacturer of oligonucleotides	Y	Methods in Main Text, line 208-209 page 6
7. dPCR PROTOCOL
Manufacturer of dPCR instrument and instrument model	Y	Methods of Main Text and References in Methods, lines 213-223, page 6
Buffer/kit manufacturer with catalogue and lot number	Y	Methods of Main Text and References in Methods, line 206, page 6
Primer and probe concentration	Y	Methods of Main Text, lines 204-210, page 6
Pre-reaction volume and composition (incl. amount of template and if restriction enzyme added)	Y	Methods of Main Text, lines 204-210, page 6
Template treatment (initial heating or chemical denaturation)	N	NA
Polymerase identity and concentration, Mg++ and dNTP concentrations***	N	Included in Kit Manuals
Complete thermocycling parameters	Y	Methods of Main Text, lines 215-220, page 6
8. ASSAY VALIDATION
Details of optimisation performed	N	Commercial Kit
Analytical specificity (vs. related sequences) and limit of blank (LOB)	N	Provided in assay reference, also methods lines 131-135, page 4
Analytical sensitivity/LoD and how this was evaluated	Y	Methods of Main Text and References in Methods, lines 227-228, page 7
Testing for inhibitors (from biological matrix/extraction)	Y	Methods of Main Text and References in Methods (Boehm et al data descriptor) lines 172-175, page 5			v
9. DATA ANALYSIS
Description of dPCR experimental design	Y	Methods of Main Text
Comprehensive details negative and positive of controls (whether applied for QC or for estimation of error)	Y	Methods of Main Text, lines 274-275, page 8
Partition classification method (thresholding)	Y	Methods of Main Text, lines 225-228, page 7
Examples of positive and negative experimental results (including fluorescence plots in supplemental material)	Y	Supporting Information, provided in digital repository , https://purl.stanford.edu/pp102gy1970
Description of technical replication	Y	Methods of Main Text, lines 194-196, page 6
Repeatability (intra-experiment variation)	Y	Errors on replicates reported in Main Text, lines 231-233, page 7
Reproducibility (inter-experiment/user/lab etc. variation )	N	Assays were only completed within one laboratory
Number of partitions measured (average and standard deviation )	Y	Supporting Information, provided in digital repository, https://purl.stanford.edu/pp102gy1970
Partition volume	Y	Supporting Information, provided in digital repository, https://purl.stanford.edu/pp102gy1970
Copies per partition (λ or equivalent ) (average and standard deviation)	Y	Supporting Information, provided in digital repository, https://purl.stanford.edu/pp102gy1970
dPCR analysis program (source, version)	Y	Methods of Main Text, lines 225-228, page 7
Description of normalisation method	N	NA
Statistical methods used for analysis	Y	Methods of Main Text, lines 25-0-262, page 7
Data transparency	raw data uploaded to online repository with ID:	https://purl.stanford.edu/pp102gy1970
